# Supplementary material
Source: publisher site journal article supplement (https://www.kjim.org/upload/media/kjim-2020-195-suppl9.pdf)
Supplement: Supplementary file 1 [file kjim-2020-195-suppl9.pdf]

**Supplementary Table 9. Clinical characteristics of matched cohort among patients with biopsy-proven HT-N or non-HT-N**

| Characteristic                   | Non-HT-N     | Biopsy-proven HT-N | p value |
|----------------------------------|--------------|--------------------|---------|
| Number                           | 206          | 103                |         |
| Age, yr                          | 44.5 ± 13.5  | 44.7 ± 13.7        | 0.897   |
| Male sex                         | 149 (72.3)   | 70 (68.0)          | 0.507   |
| Period of biopsy                 |              |                    |         |
| 1979–1989                        | -            | -                  |         |
| 1990–1999                        | 15 (7.3)     | 8 (7.8)            |         |
| 2000–2009                        | 46 (22.3)    | 22 (21.4)          |         |
| 2010–2018                        | 145 (70.4)   | 73 (70.9)          |         |
| SBP, mmHg                        | 139.3 ± 23.7 | 137.8 ± 23.0       | 0.607   |
| DBP, mmHg                        | 86.0 ± 16.2  | 84.7 ± 15.6        | 0.482   |
| eGFR, mL/min/1.73 m <sup>2</sup> | 44.9 ± 36.5  | 43.3 ± 35.2        | 0.711   |
| Albumin, g/dL                    | 3.9 ± 0.5    | 3.9 ± 0.5          | 0.988   |
| Hemoglobin, g/dL                 | 12.3 ± 2.3   | 12.4 ± 1.9         | 0.637   |
| UPCR, g/g Cr                     | 0.8 ± 0.5    | 0.8 ± 0.6          | 0.654   |

Values are presented as mean ± SD or number (%).

HT-N, hypertensive nephrosclerosis; SBP, systolic blood pressure; DBP, diastolic blood pressure; eGFR, estimated glomerular filtration rate; UPCR, urine protein-creatinine ratio.
